# Supplementary material for: Concentration dynamics of coarse and fine particulate matter at and around signalised traffic intersections
Source: Royal Society of Chemistry journal article supplement (doi:10.1039/c6em00215c), 2016-01-01
Supplement: c6em00215c1.pdf [file c6em00215c1.pdf]

## Supplementary Information

*for*

### Concentration dynamics of coarse and fine particulate matter at and around the signalised traffic intersections

Prashant Kumar<sup>a, b, \*</sup>, Anju Goel<sup>a</sup>

<sup>a</sup>*Department of Civil and Environmental Engineering, Faculty of Engineering and Physical Sciences (FEPS), University of Surrey, Guildford GU2 7XH, United Kingdom*

<sup>b</sup>*Environmental Flow (EnFlo) Research Centre, FEPS, University of Surrey, Guildford GU2 7XH, United Kingdom*

\*Corresponding author: *Corresponding author. Department of Civil and Environmental Engineering, Faculty of Engineering and Physical Sciences, University of Surrey, Guildford GU2 7XH, United Kingdom; Tel.: +44 1483 682762; Fax: +44 1483 682135. E-mail addresses: [P.Kumar@surrey.ac.uk](mailto:P.Kumar@surrey.ac.uk), [Prashant.Kumar@cantab.net](mailto:Prashant.Kumar@cantab.net)*

The SI Materials include:

Figures S1 to S7

Tables S1 to S12

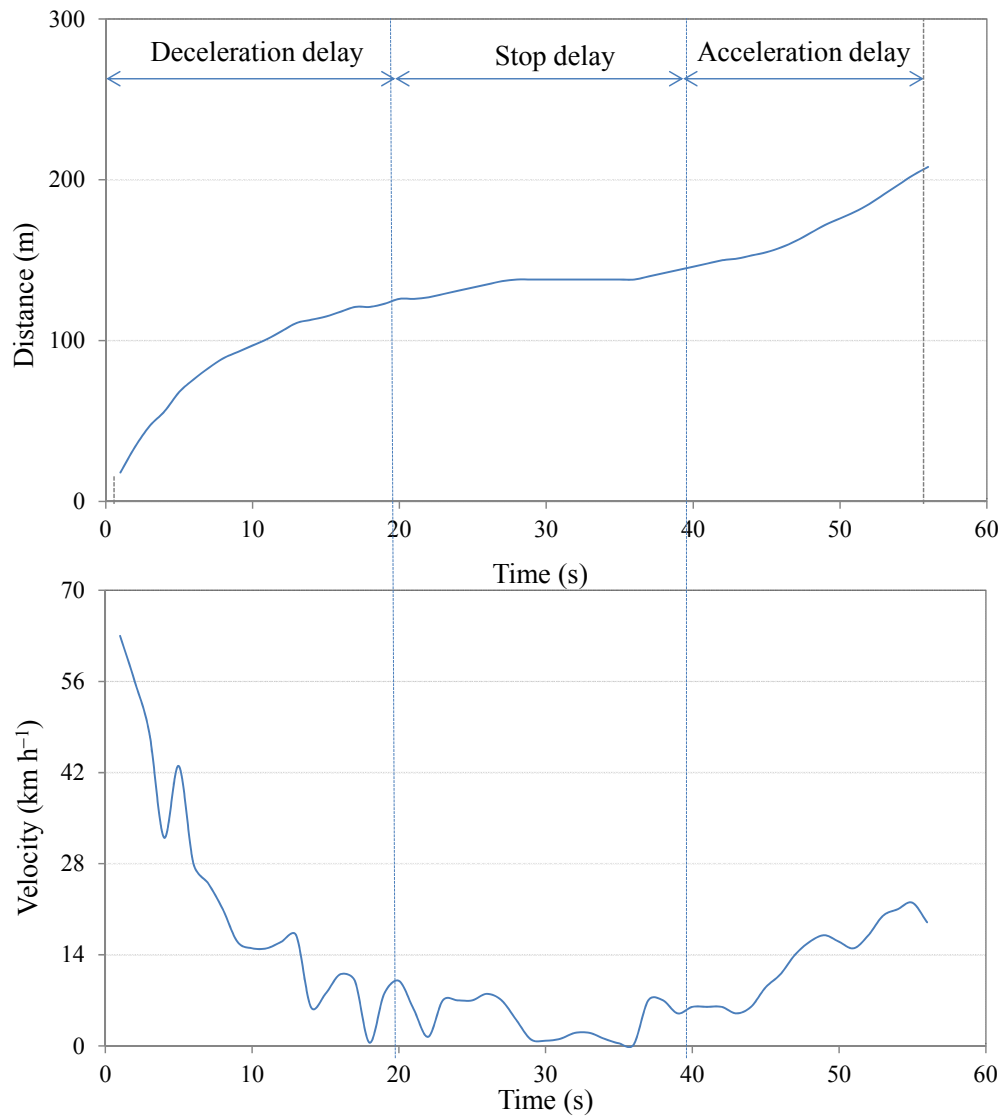

**Figure S1.** (a) Distance versus time, and (b) velocity versus time, plots of an experimental car during a delay event at a TI.

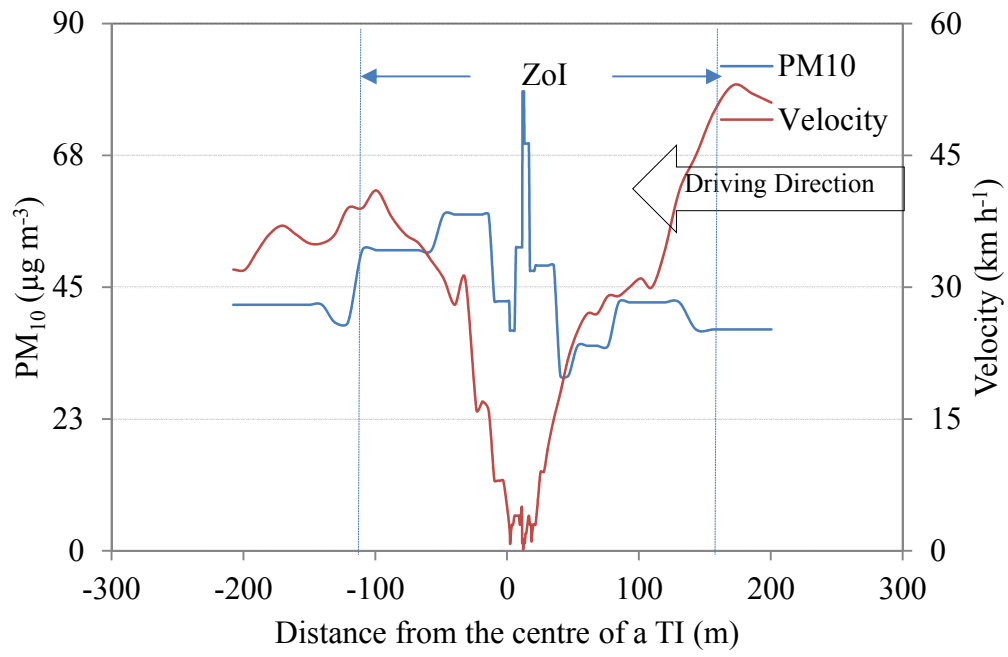

Figure S2. An example showing the estimation of ZoI at TI<sub>2</sub> during a Run 3.

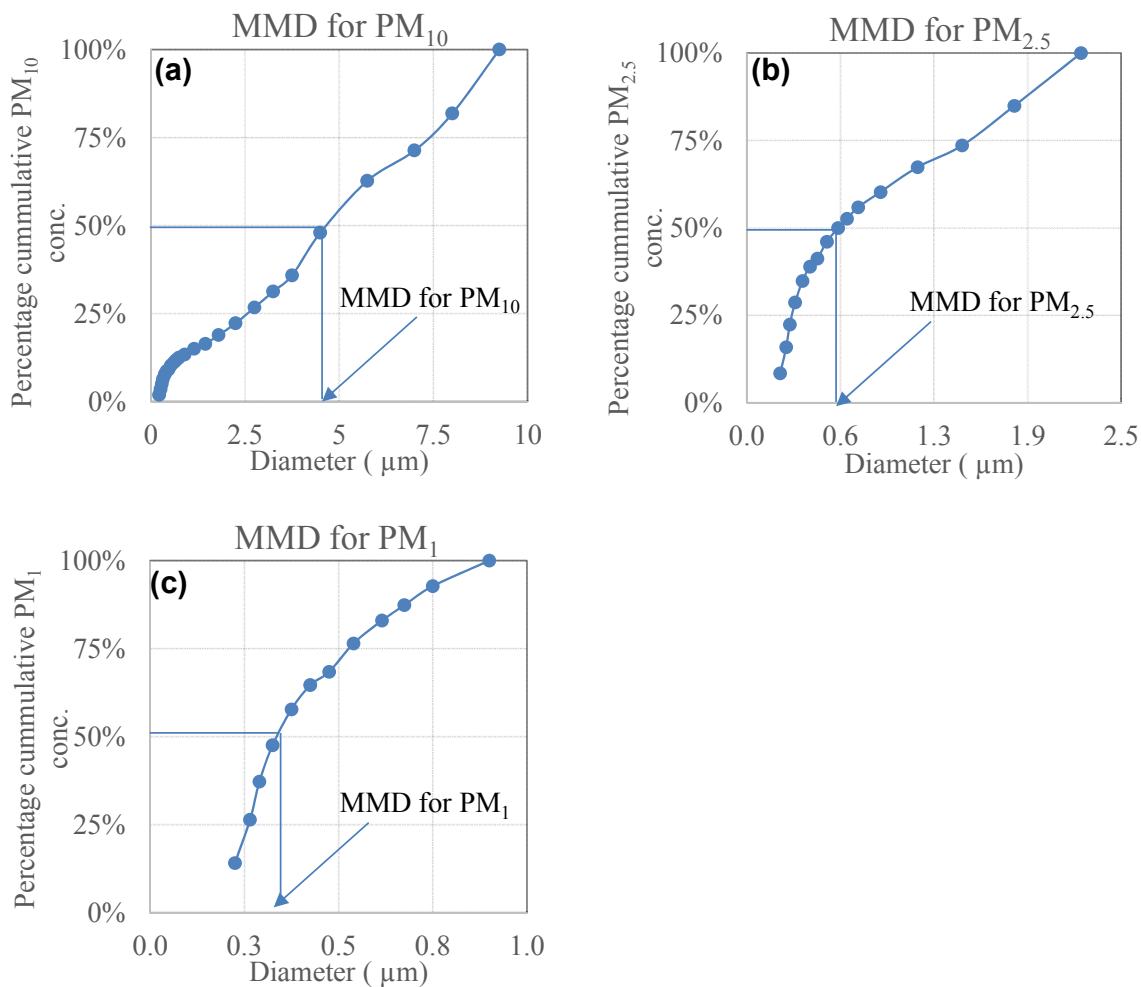

**Figure S3.** An example of Set<sub>2</sub> showing a method to estimate the MMD of (a) PM<sub>10</sub>, (b) PM<sub>2.5</sub> and (c) PM<sub>1</sub>.

In order to assess the in-cabin and on-road dynamics of particle mass concentrations (PMCs), mobile monitoring was carried out on a 6 km round route passing through the 10 different TIs. In order to assess the PMC dynamics at pedestrian pathways, fixed-site monitoring was carried out at two different types of TIs.

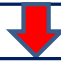

Based on the results of mobile monitoring, effect of five different ventilation settings was assessed on in-cabin exposure to PMCs. Out of the five studied ventilation settings, Set<sub>1</sub> was considered to represent on-road PMCs. The results of this setting were then used to estimate the on-road PMCs during delay and free-flow periods at the TIs. Also, based on the results of Set<sub>1</sub>, ZOI was estimated by using the methodology explained in Section 2.5.

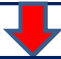

Based on the results of fixed-site monitoring, pedestrian exposure to PMCs during delay conditions is estimated. This data were also used to plot the frequency distributions of PMCs. mobile monitoring, effect of five different ventilation settings was assessed on in-cabin exposure to PMCs.

**Figure S4.** Overall framework for study design.

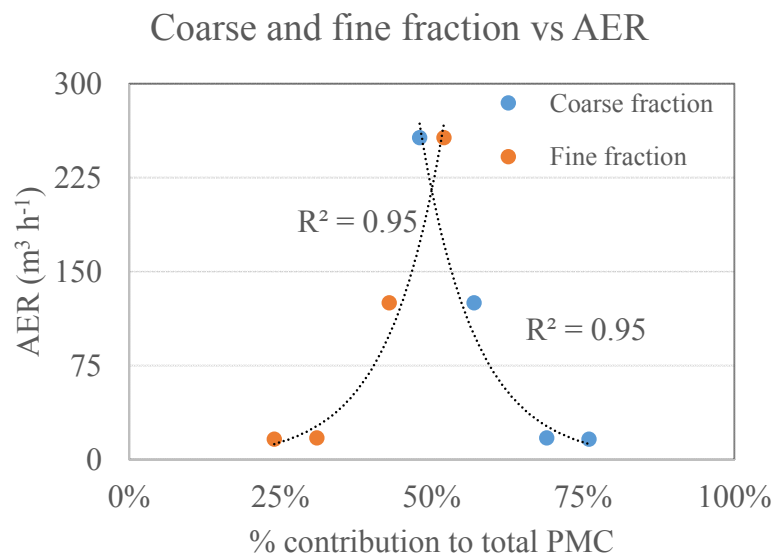

**Figure S5.** Correlation between AER and percentage contribution of the coarse (PM<sub>2.5-10</sub>) and fine (PM<sub>2.5</sub>) particles to total PMCs during different ventilation settings.

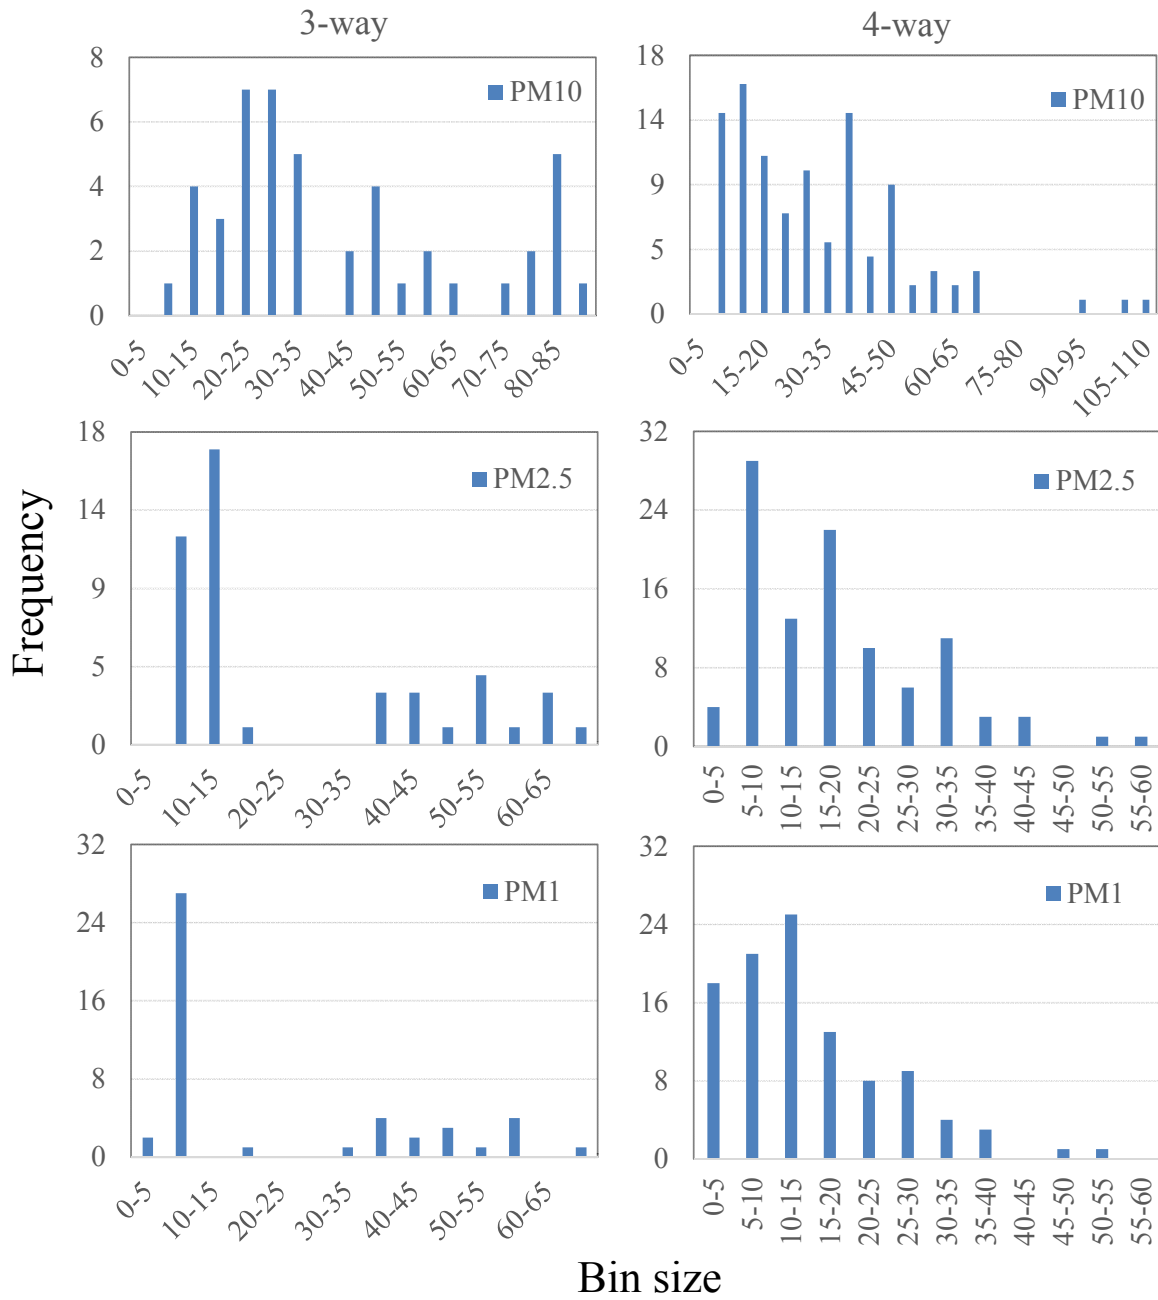

**Figure S6.** Frequency histogram for PM<sub>10</sub>, PM<sub>2.5</sub> and PM<sub>1</sub> at 3- and 4-way TIs, respectively.

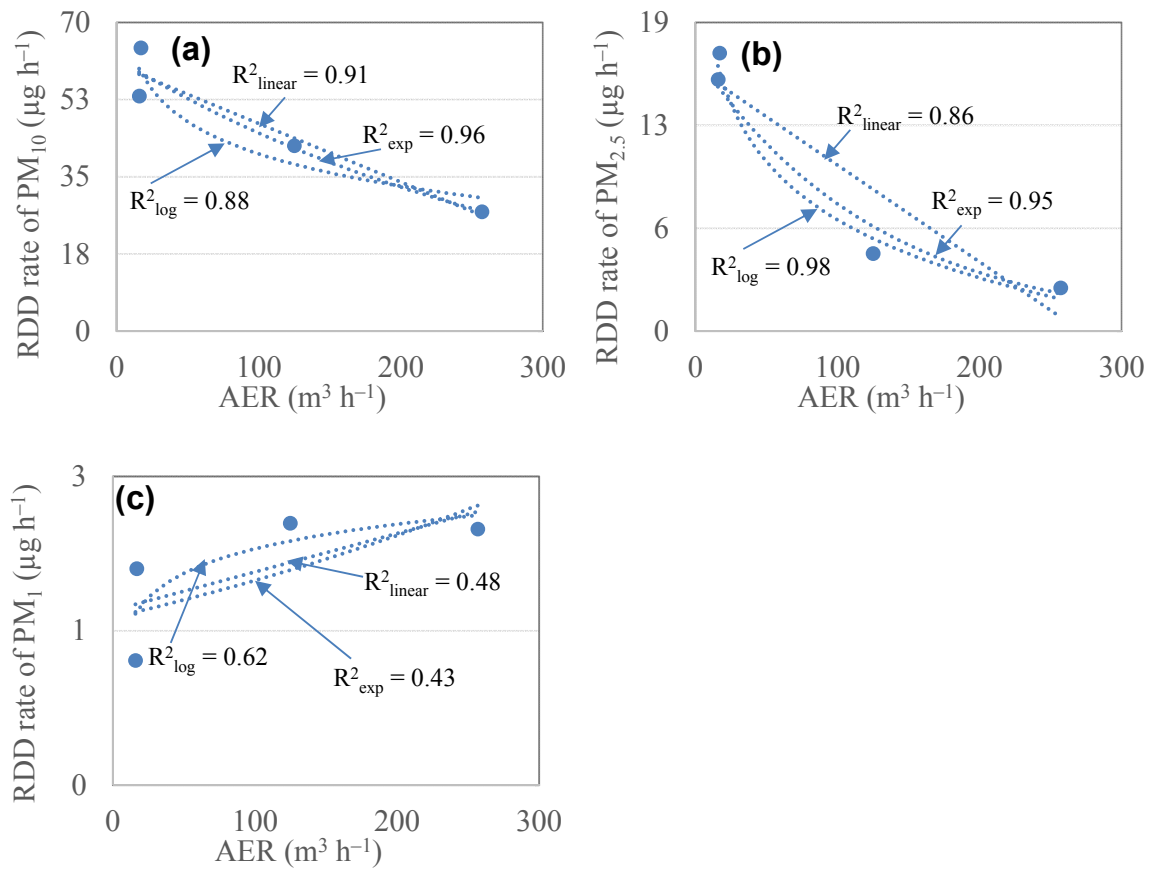

**Figure S7.** Correlation between AER of different ventilation settings and RDD rate of (a) PM<sub>10</sub> (b) PM<sub>2.5</sub> and (c) PM<sub>1</sub> during delays at TIs.



**Table S1.** Summary of traffic volume (veh h<sup>-1</sup>) and heavy duty diesel vehicles (HDVs) at two different types of TIs.<sup>12</sup>

| Hour      | 4-way TI      |           | 3-way TI      |           |
|-----------|---------------|-----------|---------------|-----------|
|           | Total traffic | HDV       | Total traffic | HDV       |
| 8–9       | 6672          | 192       | 5316          | 324       |
| 9–10      | 5652          | 312       | 5160          | 432       |
| 10–11     | 3828          | 156       | 4464          | 372       |
| 11–12     | 4656          | 264       | 6096          | 312       |
| 12–13     | 3996          | 192       | 5400          | 432       |
| 13–14     | 5439          | 266       | 6252          | 216       |
| 14–15     | 4584          | 144       | 5616          | 336       |
| 15–16     | 5436          | 228       | 6060          | 312       |
| 16–17     | 6576          | 192       | 5496          | 396       |
| 17–18     | 5844          | 240       | 5124          | 348       |
| 18–19     | 4860          | 144       | 4764          | 96        |
| 19–20     | 2628          | 72        | 4652          | 56        |
| Total (%) | 60171         | 2402 (4%) | 64400         | 3632 (6%) |

**Table S2.** Average local background PMCs ( $\mu\text{g m}^{-3}$ ) of  $\text{PM}_{10}$ ,  $\text{PM}_{2.5}$  and  $\text{PM}_1$  along with standard deviation ( $\sigma$ ) during the different ventilation settings. These are estimated based on 5<sup>th</sup> percentile value of 30 s rolling average of the 6s PM concentration time series.

| Monitoring type       | Ventilation settings / Types of TI | $\text{PM}_{10}$       | $\text{PM}_{2.5}$      | $\text{PM}_1$          |
|-----------------------|------------------------------------|------------------------|------------------------|------------------------|
|                       |                                    | (Average $\pm\sigma$ ) | (Average $\pm\sigma$ ) | (Average $\pm\sigma$ ) |
| Mobile monitoring     | Set <sub>1</sub>                   | 28 $\pm$ 6             | 16 $\pm$ 2             | 11 $\pm$ 2             |
|                       | Set <sub>2</sub>                   | 16 $\pm$ 3             | 9 $\pm$ 3              | 7 $\pm$ 2              |
|                       | Set <sub>3</sub>                   | 10 $\pm$ 5             | 8 $\pm$ 4              | 7 $\pm$ 4              |
|                       | Set <sub>4</sub>                   | 21 $\pm$ 10            | 7 $\pm$ 3              | 5 $\pm$ 2              |
|                       | Set <sub>5</sub>                   | 25 $\pm$ 10            | 11 $\pm$ 7             | 8 $\pm$ 5              |
| Fixed-site monitoring | 3-way                              | 22 $\pm$ 21            | 16 $\pm$ 15            | 13 $\pm$ 15            |
|                       | 4-way                              | 16 $\pm$ 10            | 11 $\pm$ 6             | 8 $\pm$ 6              |

**Table S3.** Average deposition fraction (DF) of PM<sub>10</sub>, PM<sub>2.5</sub> and PM<sub>1</sub> during mobile and fixed-site measurements. “ $\sigma$ ” refers to standard deviation and MMD means mass median diameter that have been estimated using method explained in Section 2.5 (SI Figure S2).

| Monitoring type | Ventilation setting/<br>type of TI | DF for PM <sub>10</sub> ,<br>average $\pm \sigma$<br>(MMD, $\mu\text{m}$ ) | DF for PM <sub>2.5</sub> ,<br>average $\pm \sigma$<br>(MMD, $\mu\text{m}$ ) | DF for PM <sub>1</sub> ,<br>average $\pm \sigma$<br>(MMD, $\mu\text{m}$ ) |
|-----------------|------------------------------------|----------------------------------------------------------------------------|-----------------------------------------------------------------------------|---------------------------------------------------------------------------|
| Mobile          | Set <sub>1</sub>                   | 0.92 $\pm$ 0.04 (4.0)                                                      | 0.24 $\pm$ 0.11 (0.7)                                                       | 0.13 $\pm$ 0.003 (0.3)                                                    |
|                 | Set <sub>2</sub>                   | 0.88 $\pm$ 0.06(3.2)                                                       | 0.23 $\pm$ 0.01 (0.7)                                                       | 0.15 $\pm$ 0.02 (0.4)                                                     |
|                 | Set <sub>3</sub>                   | 0.80 $\pm$ 0.09 (2.2)                                                      | 0.15 $\pm$ 0.02 (0.4)                                                       | 0.13 $\pm$ 0.002 (0.3)                                                    |
|                 | Set <sub>4</sub>                   | 0.95 $\pm$ 0.001(4.6)                                                      | 0.32 $\pm$ 0.03 (0.8)                                                       | 0.13 $\pm$ 0.001 (0.3)                                                    |
|                 | Set <sub>5</sub>                   | 0.94 $\pm$ 0.004(4.1)                                                      | 0.32 $\pm$ 0.115 (0.8)                                                      | 0.13 $\pm$ 0.003 (0.3)                                                    |
| Fixed-site      | 3-way                              | 0.84 $\pm$ 0.01(2.3)                                                       | 0.14 $\pm$ 0.02 (0.4)                                                       | 0.13 $\pm$ 0.002 (0.3)                                                    |
|                 | 4-way                              | 0.88 $\pm$ 0.01(2.5)                                                       | 0.14 $\pm$ 0.02 (0.4)                                                       | 0.13 $\pm$ 0.002 (0.3)                                                    |

**Table S4.** Average concentrations with and without background corrections of PM<sub>10</sub>, PM<sub>2.5</sub> and PM<sub>1</sub> under five different ventilation settings along with mass median diameter (MMD) and air exchange rate (AER) inside the car cabin.

| Ventilation settings | PM <sub>10</sub> (Average±σ)  |                            | PM <sub>2.5</sub> (Average±σ) |                            | PM <sub>1</sub> (Average±σ)   |                            | AER (m <sup>3</sup> h <sup>-1</sup> ) |
|----------------------|-------------------------------|----------------------------|-------------------------------|----------------------------|-------------------------------|----------------------------|---------------------------------------|
|                      | (μg m <sup>-3</sup> )         |                            | (μg m <sup>-3</sup> )         |                            | (μg m <sup>-3</sup> )         |                            |                                       |
|                      | Without background correction | With background correction | Without background correction | With background correction | Without background correction | With background correction |                                       |
| Set <sub>1</sub>     | 44±13                         | 16±7                       | 21±4                          | 5±2                        | 14±3                          | 3±1                        | –                                     |
| Set <sub>2</sub>     | 31±8                          | 15±5                       | 13±5                          | 4±2                        | 9±4                           | 2±2                        | 125                                   |
| Set <sub>3</sub>     | 23±7                          | 13±2                       | 12±4                          | 4±1                        | 11±4                          | 4±0                        | 257                                   |
| Set <sub>4</sub>     | 38±12                         | 17±2                       | 9±3                           | 2±1                        | 5±2                           | 0                          | 16                                    |
| Set <sub>5</sub>     | 45±14                         | 20±4                       | 14±7                          | 3±0                        | 9±5                           | 1±0                        | 17                                    |

**Table S5.** Starting point ( $X_1$ ) and end point ( $X_2$ ) of the zone of influence for PM<sub>10</sub> at ten TIs during each of the 22 runs of Set<sub>1</sub> in stop- and go-driving conditions.

| Run No         | TI <sub>1</sub> |            | TI <sub>2</sub> |             | TI <sub>3</sub> |            | TI <sub>4</sub> |             | TI <sub>5</sub> |             | TI <sub>6</sub> |             | TI <sub>7</sub> |            | TI <sub>8</sub> |             | TI <sub>9</sub> |            | TI <sub>10</sub> |            |
|----------------|-----------------|------------|-----------------|-------------|-----------------|------------|-----------------|-------------|-----------------|-------------|-----------------|-------------|-----------------|------------|-----------------|-------------|-----------------|------------|------------------|------------|
|                | $X_1$           | $X_2$      | $X_1$           | $X_2$       | $X_1$           | $X_2$      | $X_1$           | $X_2$       | $X_1$           | $X_2$       | $X_1$           | $X_2$       | $X_1$           | $X_2$      | $X_1$           | $X_2$       | $X_1$           | $X_2$      | $X_1$            | $X_2$      |
| R1             | 109             | -23        | 23              | -56         | -               | -          | -               | -           | -               | -           | -               | -           | 107             | 52         | -               | -           | -               | -          | 68               | 54         |
| R2             | 13              | -96        | -               | -           | -               | -          | 153             | 99          | 83              | -167        | 87              | 49          | -               | -          | 54              | 15          | -               | -          | 79               | 31         |
| R3             | 102             | -68        | -               | -           | 45              | -38        | 59              | -17         | 34              | -115        | -               | -           | 129             | 17         | 42              | -11         | -               | -          | -                | -          |
| R4             | -               | -          | 108             | -121        | 15              | -71        | 58              | 32          | 110             | -160        | -               | -           | -               | -          | 39              | 6           | 134             | -27        | -                | -          |
| R5             | -               | -          | 90              | 31          | 143             | -55        | -               | -           | -               | -           | -               | -           | -               | -          | -               | -           | -               | -          | 97               | -5         |
| R6             | -               | -          | -               | -           | -               | -          | 116             | -33         | -               | -           | -               | -           | -               | -          | 53              | -100        | 154             | -7         | -                | -          |
| R7             | 144             | 59         | -               | -           | -               | -          | -               | -           | -               | -           | -               | -           | -               | -          | -               | -           | 131             | 26         | -                | -          |
| R8             | 81              | 29         | -               | -           | -               | -          | 34              | -78         | -               | -           | -               | -           | 164             | 49         | 114             | -77         | -               | -          | -                | -          |
| R9             | -               | -          | -               | -           | -               | -          | 0               | -190        | -               | -           | -               | -           | 16              | -82        | -               | -           | 109             | -7         | 61               | 27         |
| R10            | -               | -          | 84              | -18         | -               | -          | 141             | -73         | -               | -           | -               | -           | -               | -          | -               | -           | -               | -          | 68               | 31         |
| R11            | 50              | -19        | 126             | 7           | -               | -          | 65              | 37          | 156             | 137         | -               | -           | -               | -          | -               | -           | 25              | -21        | -                | -          |
| R12            | 19              | 50         | -               | -           | -               | -          | 83              | -18         | -               | -           | -               | -           | 200             | 23         | -               | -           | -               | -          | 70               | -16        |
| R13            | -               | -          | -               | -           | -               | -          | -               | -           | 117             | -81         | -               | -           | -               | -          | 22.3            | 9.2         | -               | -          | -                | -          |
| R14            | -               | -          | 137             | 97          | -               | -          | 46              | -15         | -               | -           | -               | -           | -               | -          | 110             | 48          | 11              | -5         | -                | -          |
| R15            | -               | -          | 84              | -120        | -               | -          | 75              | 27          | -               | -           | 50              | -134        | 151             | -33        | 70              | -31         | 68              | -47        | -                | -          |
| R16            | -               | -          | -               | -           | -               | -          | 19              | -120        | 117             | -81         | -               | -           | 133             | 66         | -               | -           | 153             | -47        | -                | -          |
| R17            | -               | -          | 150             | -28         | -               | -          | 189             | -104        | 85              | 52          | 91              | -137        | 181             | -22        | -               | -           | -               | -          | -                | -          |
| R18            | 137             | 44         | -               | -           | 92              | 14         | -               | -           | -               | -           | 137             | -94         | -               | -          | 89              | 49          | -               | -          | -                | -          |
| R19            | -               | -          | 58              | -43         | 74              | -22        | 109             | 14          | -               | -           | 123             | 21          | -               | -          | -               | -           | -               | -          | 55               | -20        |
| R20            | 51              | -72        | 72              | 0           | -               | -          | 142             | -6          | 73              | -67         | -               | -           | 116             | 23         | 97              | 68          | -               | -          | 100              | 58         |
| R21            | 94              | -46        | 58              | -35         | -               | -          | 140             | 70          | -               | -           | -               | -           | 73              | -73        | -               | -           | -               | -          | -                | -          |
| R22            | -               | -          | 84              | -68         | -               | -          | 74              | -91         | 146             | -77         | -               | -           | -               | -          | -               | -           | -               | -          | -                | -          |
| <b>Max</b>     | <b>144</b>      | <b>59</b>  | <b>150</b>      | <b>97</b>   | <b>143</b>      | <b>14</b>  | <b>189</b>      | <b>99</b>   | <b>156</b>      | <b>137</b>  | <b>137</b>      | <b>49</b>   | <b>200</b>      | <b>66</b>  | <b>114</b>      | <b>68</b>   | <b>154</b>      | <b>26</b>  | <b>100</b>       | <b>58</b>  |
| <b>Min</b>     | <b>13</b>       | <b>-96</b> | <b>23</b>       | <b>-121</b> | <b>15</b>       | <b>-71</b> | <b>0</b>        | <b>-190</b> | <b>34</b>       | <b>-167</b> | <b>50</b>       | <b>-137</b> | <b>16</b>       | <b>-82</b> | <b>22</b>       | <b>-100</b> | <b>11</b>       | <b>-47</b> | <b>55</b>        | <b>-20</b> |
| <b>Average</b> | <b>80</b>       | <b>-14</b> | <b>90</b>       | <b>-30</b>  | <b>74</b>       | <b>-34</b> | <b>88</b>       | <b>-27</b>  | <b>102</b>      | <b>-62</b>  | <b>98</b>       | <b>-59</b>  | <b>127</b>      | <b>2</b>   | <b>69</b>       | <b>-2</b>   | <b>98</b>       | <b>-17</b> | <b>75</b>        | <b>20</b>  |
| <b>Stdev</b>   | <b>46</b>       | <b>57</b>  | <b>36</b>       | <b>61</b>   | <b>48</b>       | <b>33</b>  | <b>52</b>       | <b>74</b>   | <b>38</b>       | <b>98</b>   | <b>34</b>       | <b>88</b>   | <b>54</b>       | <b>52</b>  | <b>32</b>       | <b>54</b>   | <b>57</b>       | <b>24</b>  | <b>16</b>        | <b>30</b>  |
| <b>Median</b>  | <b>88</b>       | <b>-21</b> | <b>84</b>       | <b>-32</b>  | <b>74</b>       | <b>-38</b> | <b>75</b>       | <b>-17</b>  | <b>110</b>      | <b>-81</b>  | <b>91</b>       | <b>-94</b>  | <b>131</b>      | <b>20</b>  | <b>62</b>       | <b>8</b>    | <b>120</b>      | <b>-14</b> | <b>69</b>        | <b>29</b>  |

**Table S6.** Starting point ( $X_1$ ) and end point ( $X_2$ ) of the zone of influence for PM<sub>2.5</sub> at ten TIs during each of the 22 runs of Set<sub>1</sub> in stop- and go-driving conditions.

| Run No         | TI <sub>1</sub> |             | TI <sub>2</sub> |            | TI <sub>3</sub> |            | TI <sub>4</sub> |            | TI <sub>5</sub> |            | TI <sub>6</sub> |             | TI <sub>7</sub> |            | TI <sub>8</sub> |            | TI <sub>9</sub> |           | TI <sub>10</sub> |            |
|----------------|-----------------|-------------|-----------------|------------|-----------------|------------|-----------------|------------|-----------------|------------|-----------------|-------------|-----------------|------------|-----------------|------------|-----------------|-----------|------------------|------------|
|                | $X_1$           | $X_2$       | $X_1$           | $X_2$      | $X_1$           | $X_2$      | $X_1$           | $X_2$      | $X_1$           | $X_2$      | $X_1$           | $X_2$       | $X_1$           | $X_2$      | $X_1$           | $X_2$      | $X_1$           | $X_2$     | $X_1$            | $X_2$      |
| R1             | 110             | 75          | 112             | 0          | -               | -          | -               | -          | -               | -          | -               | -           | 115             | 40         | -               | -          | -               | -         | 95               | 22         |
| R2             | 46              | -165        | -               | -          | -               | -          | 169             | 67         | 92              | -          | 157             | 115         | 20              | -          | -               | -          | -               | -         | 79               | 31         |
| R3             | 115             | -14         | -               | -          | 93              | 10         | -               | -          | 0               | 94         | -               | -           | 119             | -43        | 60              | -30        | -               | -         | -                | -          |
| R4             | -               | -           | 97              | -62        | 51              | -61        | -               | -          | 74              | -25        | -               | -           | -               | -          | 47              | 0          | 56              | 0         | -                | -          |
| R5             | -               | -           | 95              | 54         | 143             | 43         | -               | -          | -               | -          | -               | -           | -               | -          | -               | -          | -               | -         | 46               | 0          |
| R6             | -               | -           | -               | -          | -               | -          | 112             | -16        | -               | -          | -               | -           | -               | -          | 76              | -88        | 65              | -7        | -                | -          |
| R7             | 178             | 27          | -               | -          | -               | -          | -               | -          | -               | -          | -               | -           | -               | -          | -               | -          | 126             | 94        | -                | -          |
| R8             | 122             | 22          | -               | -          | -               | -          | 162             | 82         | -               | -          | -               | -           | 107             | 49         | 125             | -77        | -               | -         | -                | -          |
| R9             | -               | -           | -               | -          | -               | -          | 155             | 22         | -               | -          | -               | -           | 32              | -43        | -               | -          | 37              | 0         | 49               | 34         |
| R10            | -               | -           | 91              | 17         | -               | -          | 125             | 57         | -               | -          | -               | -           | -               | -          | -               | -          | -               | -         | 78               | -12        |
| R11            | 50              | -14         | 126             | 44         | -               | -          | 183             | 48         | 21              | -39        | -               | -           | -               | -          | -               | -          | 25              | 13        | -                | -          |
| R12            | 101             | -112        | -               | -          | -               | -          | 82              | 46         | -               | -          | -               | -           | 171             | 160        | -               | -          | -               | -         | 70               | -23        |
| R13            | -               | -           | -               | -          | -               | -          | -               | -          | 161             | -81        | -               | -           | -               | -          | 70              | -44        | -               | -         | -                | -          |
| R14            | -               | -           | 137             | 97         | -               | -          | 54              | 17         | -               | -          | -               | -           | -               | -          | 91              | 52         | 119             | 25        | -                | -          |
| R15            | -               | -           | 40              | -57        | -               | -          | 154             | 69         | -               | -          | 50              | -194        | 164             | -71        | 138             | -46        | 68              | 34        | -                | -          |
| R16            | -               | -           | -               | -          | -               | -          | 164             | 79         | 161             | -81        | -               | -           | 150             | 54         | -               | -          | 44              | 47        | -                | -          |
| R17            | -               | -           | 65              | -38        | -               | -          | 194             | 74         | 74              | 0          | -               | -           | 109             | -49        | -               | -          | -               | -         | -                | -          |
| R18            | 137             | 32          | -               | -          | 79              | 19         | -               | -          | -               | -          | -               | -           | -               | -          | 121             | 0          | -               | -         | -                | -          |
| R19            | -               | -           | 38              | -13        | 62              | -33        | 88              | 56         | -               | -          | 133             | -10         | -               | -          | -               | -          | -               | -         | 94               | -11        |
| R20            | 74              | -72         | 96              | -22        | -               | -          | 142             | 0          | 83              | -46        | -               | -           | 138             | 27         | 196             | 35         | -               | -         | 96               | 44         |
| R21            | 62              | 0           | 59              | 0          | -               | -          | 160             | 70         | -               | -          | -               | -           | -               | -          | -               | -          | -               | -         | -                | -          |
| R22            | -               | -           | 61              | -7         | -               | -          | -               | -          | -               | -          | -               | -           | -               | -          | -               | -          | -               | -         | -                | -          |
| <b>Max</b>     | <b>178</b>      | <b>75</b>   | <b>137</b>      | <b>97</b>  | <b>143</b>      | <b>43</b>  | <b>194</b>      | <b>82</b>  | <b>161</b>      | <b>94</b>  | <b>133</b>      | <b>20</b>   | <b>171</b>      | <b>160</b> | <b>196</b>      | <b>52</b>  | <b>126</b>      | <b>94</b> | <b>96</b>        | <b>44</b>  |
| <b>Min</b>     | <b>46</b>       | <b>-165</b> | <b>38</b>       | <b>-62</b> | <b>51</b>       | <b>-61</b> | <b>54</b>       | <b>-16</b> | <b>0</b>        | <b>157</b> | <b>50</b>       | <b>-194</b> | <b>32</b>       | <b>-71</b> | <b>47</b>       | <b>-88</b> | <b>25</b>       | <b>47</b> | <b>46</b>        | <b>-23</b> |
| <b>Average</b> | <b>100</b>      | <b>-22</b>  | <b>85</b>       | <b>1</b>   | <b>86</b>       | <b>-4</b>  | <b>139</b>      | <b>48</b>  | <b>83</b>       | <b>-42</b> | <b>99</b>       | <b>-61</b>  | <b>123</b>      | <b>14</b>  | <b>103</b>      | <b>-22</b> | <b>68</b>       | <b>-4</b> | <b>76</b>        | <b>11</b>  |
| <b>Stdev</b>   | <b>42</b>       | <b>73</b>   | <b>32</b>       | <b>46</b>  | <b>36</b>       | <b>42</b>  | <b>41</b>       | <b>31</b>  | <b>57</b>       | <b>73</b>  | <b>44</b>       | <b>116</b>  | <b>41</b>       | <b>73</b>  | <b>47</b>       | <b>48</b>  | <b>37</b>       | <b>43</b> | <b>20</b>        | <b>25</b>  |
| <b>Median</b>  | <b>106</b>      | <b>-7</b>   | <b>93</b>       | <b>-4</b>  | <b>79</b>       | <b>10</b>  | <b>155</b>      | <b>57</b>  | <b>79</b>       | <b>-43</b> | <b>115</b>      | <b>-10</b>  | <b>119</b>      | <b>27</b>  | <b>91</b>       | <b>-30</b> | <b>61</b>       | <b>10</b> | <b>79</b>        | <b>11</b>  |

**Table S7.** Starting point ( $X_1$ ) and end point ( $X_2$ ) of the zone of influence for  $PM_1$  at ten TIs during each of the 22 runs of Set<sub>1</sub> in stop– and go-driving conditions.

| Run No         | TI <sub>1</sub> |             | TI <sub>2</sub> |            | TI <sub>3</sub> |            | TI <sub>4</sub> |            | TI <sub>5</sub> |            | TI <sub>6</sub> |             | TI <sub>7</sub> |            | TI <sub>8</sub> |            | TI <sub>9</sub> |            | TI <sub>10</sub> |            |
|----------------|-----------------|-------------|-----------------|------------|-----------------|------------|-----------------|------------|-----------------|------------|-----------------|-------------|-----------------|------------|-----------------|------------|-----------------|------------|------------------|------------|
|                | $X_1$           | $X_2$       | $X_1$           | $X_2$      | $X_1$           | $X_2$      | $X_1$           | $X_2$      | $X_1$           | $X_2$      | $X_1$           | $X_2$       | $X_1$           | $X_2$      | $X_1$           | $X_2$      | $X_1$           | $X_2$      | $X_1$            | $X_2$      |
| R1             | 115             | 79          | 103             | 0          | –               | –          | –               | –          | –               | –          | –               | –           | 107             | 40         | –               | –          | –               | –          | 113              | 10         |
| R2             | 46              | –135        | –               | –          | –               | –          | 190             | 0          | 145             | –          | 156             | 44          | –               | –          | –               | –          | –               | –          | 87               | 27         |
| R3             | 69              | 22          | –               | –          | 24              | 16         | –               | –          | 34              | –88        | –               | –           | 119             | –43        | 50              | –17        | –               | –          | –                | –          |
| R4             | –               | –           | 87              | –40        | 51              | –92        | –               | –          | 49              | –4         | –               | –           | –               | –          | 42              | 0          | 50              | 0          | –                | –          |
| R5             | –               | –           | 83              | –15        | 158             | –36        | –               | –          | –               | –          | –               | –           | –               | –          | –               | –          | –               | –          | 97               | –23        |
| R6             | –               | –           | –               | –          | –               | –          | 194             | –16        | –               | –          | –               | –           | –               | –          | 53              | –60        | 117             | 19         | –                | –          |
| R7             | 153             | 70          | –               | –          | –               | –          | –               | –          | –               | –          | –               | –           | –               | –          | –               | –          | 126             | 115        | –                | –          |
| R8             | 110             | 29          | –               | –          | –               | –          | 186             | 72         | –               | –          | –               | –           | 164             | 18         | 104             | –77        | –               | –          | –                | –          |
| R9             | –               | –           | –               | –          | –               | –          | 155             | 40         | –               | –          | –               | –           | 125             | –          | –               | –          | 22              | 8          | 54               | 27         |
| R10            | –               | –           | 99              | –51        | –               | –          | 146             | 69         | –               | –          | –               | –           | –               | –          | –               | –          | –               | –          | 68               | –12        |
| R11            | 31              | 40          | 126             | 54         | –               | –          | 183             | 48         | 0               | 74         | –               | –           | –               | –          | –               | –          | 20              | –7         | –                | –          |
| R12            | 127             | –112        | –               | –          | –               | –          | 90              | 17         | –               | –          | –               | –           | 134             | 15         | –               | –          | –               | –          | 62               | –16        |
| R13            | –               | –           | –               | –          | –               | –          | –               | –          | 40              | –60        | –               | –           | –               | –          | 70              | –30        | –               | –          | –                | –          |
| R14            | –               | –           | 112             | 100        | –               | –          | 54              | 16         | –               | –          | –               | –           | –               | –          | 81              | 52         | 22              | –64        | –                | –          |
| R15            | –               | –           | 35              | –32        | –               | –          | 59              | 27         | –               | –          | 50              | –194        | 164             | –93        | –               | –          | 60              | –47        | –                | –          |
| R16            | –               | –           | –               | –          | –               | –          | 158             | 83         | 40              | –60        | –               | –           | 149             | 48         | –               | –          | 32              | –47        | –                | –          |
| R17            | –               | –           | 106             | 36         | –               | –          | 183             | 38         | 63              | 0          | –               | –           | –               | –          | –               | –          | –               | –          | –                | –          |
| R18            | 81              | 18          | –               | –          | 79              | 19         | –               | –          | –               | –          | –               | –           | –               | –          | 129             | 0          | –               | –          | –                | –          |
| R19            | –               | –           | 34              | 0          | 86              | –12        | 86              | 57         | –               | –          | 133             | –43         | –               | –          | –               | –          | –               | –          | 84               | 0          |
| R20            | 127             | –72         | 96              | –22        | –               | –          | –               | –          | 100             | 14         | –               | –           | 157             | 33         | 190             | 18         | –               | –          | 96               | 30         |
| R21            | 62              | 28          | 59              | 14         | –               | –          | 139             | 70         | –               | –          | –               | –           | –               | –          | –               | –          | –               | –          | –                | –          |
| R22            | –               | –           | 38              | 5          | –               | –          | –               | –          | –               | –          | –               | –           | –               | –          | –               | –          | –               | –          | –                | –          |
| <b>Max</b>     | <b>153</b>      | <b>79</b>   | <b>126</b>      | <b>100</b> | <b>158</b>      | <b>19</b>  | <b>194</b>      | <b>83</b>  | <b>145</b>      | <b>74</b>  | <b>156</b>      | <b>44</b>   | <b>164</b>      | <b>48</b>  | <b>190</b>      | <b>52</b>  | <b>126</b>      | <b>115</b> | <b>113</b>       | <b>30</b>  |
| <b>Min</b>     | <b>31</b>       | <b>–135</b> | <b>34</b>       | <b>–51</b> | <b>24</b>       | <b>–92</b> | <b>54</b>       | <b>–16</b> | <b>0</b>        | <b>157</b> | <b>50</b>       | <b>–194</b> | <b>107</b>      | <b>137</b> | <b>42</b>       | <b>–77</b> | <b>20</b>       | <b>–64</b> | <b>54</b>        | <b>–23</b> |
| <b>Average</b> | <b>92</b>       | <b>–3</b>   | <b>82</b>       | <b>4</b>   | <b>80</b>       | <b>–21</b> | <b>140</b>      | <b>40</b>  | <b>59</b>       | <b>–35</b> | <b>113</b>      | <b>–64</b>  | <b>140</b>      | <b>–15</b> | <b>90</b>       | <b>–14</b> | <b>56</b>       | <b>–3</b>  | <b>83</b>        | <b>5</b>   |
| <b>Stdev</b>   | <b>40</b>       | <b>75</b>   | <b>32</b>       | <b>43</b>  | <b>50</b>       | <b>46</b>  | <b>51</b>       | <b>30</b>  | <b>45</b>       | <b>71</b>  | <b>56</b>       | <b>120</b>  | <b>22</b>       | <b>69</b>  | <b>50</b>       | <b>42</b>  | <b>43</b>       | <b>56</b>  | <b>20</b>        | <b>21</b>  |
| <b>Median</b>  | <b>96</b>       | <b>25</b>   | <b>92</b>       | <b>0</b>   | <b>79</b>       | <b>–12</b> | <b>155</b>      | <b>40</b>  | <b>45</b>       | <b>–32</b> | <b>133</b>      | <b>–43</b>  | <b>142</b>      | <b>17</b>  | <b>76</b>       | <b>–9</b>  | <b>41</b>       | <b>–4</b>  | <b>86</b>        | <b>5</b>   |

**Table S8.** Starting point ( $X_1$ ) and end point ( $X_2$ ) of the zone of influence for PM<sub>10</sub> at ten TIs during each of the 22 runs of Set<sub>1</sub> in multiple stopping driving conditions.

| Run No         | TI <sub>1</sub> |            | TI <sub>2</sub> |            | TI <sub>3</sub> |       | TI <sub>4</sub> |            | TI <sub>5</sub> |            | TI <sub>6</sub> |          | TI <sub>7</sub> |            | TI <sub>8</sub> |          | TI <sub>9</sub> |            | TI <sub>10</sub> |          |
|----------------|-----------------|------------|-----------------|------------|-----------------|-------|-----------------|------------|-----------------|------------|-----------------|----------|-----------------|------------|-----------------|----------|-----------------|------------|------------------|----------|
|                | $X_1$           | $X_2$      | $X_1$           | $X_2$      | $X_1$           | $X_2$ | $X_1$           | $X_2$      | $X_1$           | $X_2$      | $X_1$           | $X_2$    | $X_1$           | $X_2$      | $X_1$           | $X_2$    | $X_1$           | $X_2$      | $X_1$            | $X_2$    |
| R1             | -               | -          | -               | -          | -               | -     | 103             | 28         | -               | -          | -               | -        | -               | -          | -               | -        | 177             | 133        | -                | -        |
| R2             | -               | -          | -               | -          | -               | -     | -               | -          | -               | -          | -               | -        | 124             | -17        | -               | -        | 158             | -37        | -                | -        |
| R3             | -               | -          | -               | -          | -               | -     | -               | -          | -               | -          | -               | -        | -               | -          | -               | -        | -               | -          | -                | -        |
| R4             | -               | -          | -               | -          | -               | -     | -               | -          | -               | -          | -               | -        | 185             | -11        | -               | -        | -               | -          | -                | -        |
| R5             | -               | -          | -               | -          | -               | -     | 70              | -50        | -               | -          | -               | -        | 150             | 55         | -               | -        | 148             | 13         | -                | -        |
| R6             | -               | -          | 98              | -34        | -               | -     | -               | -          | -               | -          | -               | -        | -               | -          | -               | -        | -               | -          | -                | -        |
| R7             | -               | -          | 140             | 10         | -               | -     | 138             | -35        | -               | -          | -               | -        | 200             | 77         | -               | -        | -               | -          | -                | -        |
| R8             | -               | -          | 204             | 0          | -               | -     | -               | -          | -               | -          | -               | -        | -               | -          | -               | -        | -               | -          | -                | -        |
| R9             | -               | -          | 102             | -80        | -               | -     | -               | -          | -               | -          | -               | -        | -               | -          | -               | -        | -               | -          | -                | -        |
| R10            | -               | -          | -               | -          | -               | -     | -               | -          | -               | -          | -               | -        | -               | -          | -               | -        | -               | -          | -                | -        |
| R11            | -               | -          | -               | -          | -               | -     | -               | -          | -               | -          | -               | -        | 143             | -41        | -               | -        | -               | -          | -                | -        |
| R12            | -               | -          | -               | -          | -               | -     | -               | -          | -               | -          | -               | -        | -               | -          | -               | -        | -               | -          | -                | -        |
| R13            | -               | -          | 132             | 11         | -               | -     | -               | -          | -               | -          | -               | -        | -               | -          | -               | -        | -               | -          | -                | -        |
| R14            | -               | -          | -               | -          | -               | -     | -               | -          | -               | -          | -               | -        | -               | -          | -               | -        | -               | -          | -                | -        |
| R15            | -               | -          | -               | -          | -               | -     | -               | -          | -               | -          | -               | -        | -               | -          | -               | -        | -               | -          | -                | -        |
| R16            | -               | -          | -               | -          | -               | -     | -               | -          | -               | -          | -               | -        | -               | -          | -               | -        | -               | -          | -                | -        |
| R17            | -               | -          | -               | -          | -               | -     | -               | -          | -               | -          | -               | -        | -               | -          | -               | -        | -               | -          | -                | -        |
| R18            | -               | -          | -               | -          | -               | -     | -               | -          | 184             | -70        | -               | -        | 139             | 27         | -               | -        | -               | -          | -                | -        |
| R19            | 190             | -26        | -               | -          | -               | -     | -               | -          | -               | -          | -               | -        | 138             | 18         | -               | -        | -               | -          | -                | -        |
| R20            | -               | -          | -               | -          | -               | -     | -               | -          | -               | -          | 102             | 0        | -               | -          | -               | -        | 86              | 15         | -                | -        |
| R21            | -               | -          | -               | -          | -               | -     | -               | -          | 111             | -79        | -               | -        | -               | -          | -               | -        | -               | -          | -                | -        |
| R22            | -               | -          | -               | -          | -               | -     | -               | -          | -               | -          | -               | -        | -               | -          | -               | -        | -               | -          | -                | -        |
| <b>Max</b>     | <b>190</b>      | <b>-26</b> | <b>204</b>      | <b>11</b>  | -               | -     | <b>138</b>      | <b>28</b>  | <b>184</b>      | <b>-70</b> | <b>102</b>      | <b>0</b> | <b>200</b>      | <b>77</b>  | <b>0</b>        | <b>0</b> | <b>177</b>      | <b>15</b>  | <b>0</b>         | <b>0</b> |
| <b>Min</b>     | <b>190</b>      | <b>-26</b> | <b>98</b>       | <b>-80</b> | -               | -     | <b>70</b>       | <b>-50</b> | <b>111</b>      | <b>-79</b> | <b>102</b>      | <b>0</b> | <b>124</b>      | <b>-41</b> | <b>0</b>        | <b>0</b> | <b>86</b>       | <b>133</b> | <b>0</b>         | <b>0</b> |
| <b>Average</b> | <b>190</b>      | <b>-26</b> | <b>135</b>      | <b>-19</b> | -               | -     | <b>104</b>      | <b>-19</b> | <b>148</b>      | <b>-75</b> | <b>102</b>      | <b>0</b> | <b>154</b>      | <b>15</b>  | -               | -        | <b>142</b>      | <b>-36</b> | -                | -        |
| <b>Stdev</b>   | -               | -          | <b>43</b>       | <b>39</b>  | -               | -     | <b>34</b>       | <b>41</b>  | <b>52</b>       | <b>6</b>   | -               | -        | <b>28</b>       | <b>42</b>  | -               | -        | <b>39</b>       | <b>69</b>  | -                | -        |
| <b>Median</b>  | <b>190</b>      | <b>-26</b> | <b>132</b>      | <b>0</b>   | -               | -     | <b>103</b>      | <b>-35</b> | <b>148</b>      | <b>-75</b> | <b>102</b>      | <b>0</b> | <b>143</b>      | <b>18</b>  | -               | -        | <b>153</b>      | <b>-12</b> | -                | -        |



**Table S9.** Starting point ( $X_1$ ) and end point ( $X_2$ ) of the zone of influence for PM<sub>2.5</sub> at ten TIs during each of the 22 runs of Set<sub>1</sub> in multiple stopping driving conditions.

| Run No         | TI <sub>1</sub> |            | TI <sub>2</sub> |            | TI <sub>3</sub> |       | TI <sub>4</sub> |            | TI <sub>5</sub> |            | TI <sub>6</sub> |       | TI <sub>7</sub> |            | TI <sub>8</sub> |          | TI <sub>9</sub> |           | TI <sub>10</sub> |          |
|----------------|-----------------|------------|-----------------|------------|-----------------|-------|-----------------|------------|-----------------|------------|-----------------|-------|-----------------|------------|-----------------|----------|-----------------|-----------|------------------|----------|
|                | $X_1$           | $X_2$      | $X_1$           | $X_2$      | $X_1$           | $X_2$ | $X_1$           | $X_2$      | $X_1$           | $X_2$      | $X_1$           | $X_2$ | $X_1$           | $X_2$      | $X_1$           | $X_2$    | $X_1$           | $X_2$     | $X_1$            | $X_2$    |
| R1             | -               | -          | -               | -          | -               | -     | 76              | 0          | -               | -          | -               | -     | -               | -          | -               | -        | 168             | -8        | -                | -        |
| R2             | -               | -          | -               | -          | -               | -     | -               | -          | -               | -          | -               | -     | 105             | -10        | -               | -        | 143             | 0         | -                | -        |
| R3             | -               | -          | -               | -          | -               | -     | -               | -          | -               | -          | -               | -     | -               | -          | -               | -        | -               | -         | -                | -        |
| R4             | -               | -          | -               | -          | -               | -     | 174             | 44         | -               | -          | -               | -     | 97              | -11        | -               | -        | -               | -         | -                | -        |
| R5             | -               | -          | -               | -          | -               | -     | 49              | 26         | -               | -          | -               | -     | 176             | 34         | -               | -        | 169             | 39        | -                | -        |
| R6             | -               | -          | 77              | 13         | -               | -     | -               | -          | -               | -          | -               | -     | -               | -          | -               | -        | -               | -         | -                | -        |
| R7             | -               | -          | 126             | 20         | -               | -     | 197             | -35        | -               | -          | -               | -     | 196             | 44         | -               | -        | -               | -         | -                | -        |
| R8             | -               | -          | 182             | -13        | -               | -     | -               | -          | -               | -          | -               | -     | -               | -          | -               | -        | -               | -         | -                | -        |
| R9             | -               | -          | 96              | 14         | -               | -     | -               | -          | -               | -          | -               | -     | -               | -          | -               | -        | -               | -         | -                | -        |
| R10            | -               | -          | -               | -          | -               | -     | -               | -          | -               | -          | -               | -     | -               | -          | -               | -        | -               | -         | -                | -        |
| R11            | -               | -          | -               | -          | -               | -     | -               | -          | -               | -          | -               | -     | 54              | -52        | -               | -        | -               | -         | -                | -        |
| R12            | -               | -          | -               | -          | -               | -     | -               | -          | -               | -          | -               | -     | -               | -          | -               | -        | -               | -         | -                | -        |
| R13            | -               | -          | 55              | -9         | -               | -     | -               | -          | -               | -          | -               | -     | -               | -          | -               | -        | -               | -         | -                | -        |
| R14            | -               | -          | -               | -          | -               | -     | -               | -          | -               | -          | -               | -     | -               | -          | -               | -        | -               | -         | -                | -        |
| R15            | -               | -          | -               | -          | -               | -     | -               | -          | -               | -          | -               | -     | -               | -          | -               | -        | -               | -         | -                | -        |
| R16            | -               | -          | -               | -          | -               | -     | -               | -          | -               | -          | -               | -     | -               | -          | -               | -        | -               | -         | -                | -        |
| R17            | -               | -          | -               | -          | -               | -     | -               | -          | -               | -          | -               | -     | -               | -          | -               | -        | -               | -         | -                | -        |
| R18            | -               | -          | -               | -          | -               | -     | -               | -          | 148             | -21        | -               | -     | 180             | 0          | -               | -        | -               | -         | -                | -        |
| R19            | 133             | -23        | -               | -          | -               | -     | -               | -          | -               | -          | -               | -     | 175             | 55         | -               | -        | -               | -         | -                | -        |
| R20            | -               | -          | -               | -          | -               | -     | -               | -          | -               | -          | -               | -     | -               | -          | -               | -        | 66              | 28        | -                | -        |
| R21            | -               | -          | -               | -          | -               | -     | -               | -          | 32              | -80        | -               | -     | -               | -          | -               | -        | -               | -         | -                | -        |
| R22            | -               | -          | -               | -          | -               | -     | 187             | 34         | -               | -          | -               | -     | -               | -          | -               | -        | -               | -         | -                | -        |
| <b>Max</b>     | <b>133</b>      | <b>-23</b> | <b>182</b>      | <b>20</b>  | -               | -     | <b>197</b>      | <b>44</b>  | <b>148</b>      | <b>-21</b> | -               | -     | <b>196</b>      | <b>55</b>  | <b>0</b>        | <b>0</b> | <b>169</b>      | <b>39</b> | <b>0</b>         | <b>0</b> |
| <b>Min</b>     | <b>133</b>      | <b>-23</b> | <b>55</b>       | <b>-13</b> | -               | -     | <b>49</b>       | <b>-35</b> | <b>32</b>       | <b>-80</b> | -               | -     | <b>54</b>       | <b>-52</b> | <b>0</b>        | <b>0</b> | <b>66</b>       | <b>-8</b> | <b>0</b>         | <b>0</b> |
| <b>Average</b> | <b>133</b>      | <b>-23</b> | <b>107</b>      | <b>5</b>   | -               | -     | <b>137</b>      | <b>14</b>  | <b>90</b>       | <b>-51</b> | -               | -     | <b>140</b>      | <b>9</b>   | -               | -        | <b>137</b>      | <b>15</b> | -                | -        |
| <b>Sdev</b>    | -               | -          | <b>49</b>       | <b>15</b>  | -               | -     | <b>69</b>       | <b>32</b>  | <b>82</b>       | <b>42</b>  | -               | -     | <b>54</b>       | <b>38</b>  | -               | -        | <b>49</b>       | <b>22</b> | -                | -        |
| <b>Median</b>  | <b>133</b>      | <b>-23</b> | <b>96</b>       | <b>13</b>  | -               | -     | <b>174</b>      | <b>26</b>  | <b>90</b>       | <b>-51</b> | -               | -     | <b>175</b>      | <b>0</b>   | -               | -        | <b>156</b>      | <b>14</b> | -                | -        |

**Table S10.** Starting point ( $X_1$ ) and end point ( $X_2$ ) of the zone of influence for  $PM_1$  at ten TIs during each of the 22 runs of Set<sub>1</sub> in multiple stopping driving conditions.

| Run No         | TI <sub>1</sub> |            | TI <sub>2</sub> |            | TI <sub>3</sub> |       | TI <sub>4</sub> |            | TI <sub>5</sub> |            | TI <sub>6</sub> |          | TI <sub>7</sub> |           | TI <sub>8</sub> |          | TI <sub>9</sub> |           | TI <sub>10</sub> |          |
|----------------|-----------------|------------|-----------------|------------|-----------------|-------|-----------------|------------|-----------------|------------|-----------------|----------|-----------------|-----------|-----------------|----------|-----------------|-----------|------------------|----------|
|                | $X_1$           | $X_2$      | $X_1$           | $X_2$      | $X_1$           | $X_2$ | $X_1$           | $X_2$      | $X_1$           | $X_2$      | $X_1$           | $X_2$    | $X_1$           | $X_2$     | $X_1$           | $X_2$    | $X_1$           | $X_2$     | $X_1$            | $X_2$    |
| R1             | -               | -          | -               | -          | -               | -     | 76              | -40        | -               | -          | -               | -        | -               | -         | -               | -        | 168             | 0         | -                | -        |
| R2             | -               | -          | -               | -          | -               | -     | -               | -          | -               | -          | -               | -        | 150             | -5        | -               | -        | 137             | 0         | -                | -        |
| R3             | -               | -          | -               | -          | -               | -     | -               | -          | -               | -          | -               | -        | -               | -         | -               | -        | -               | -         | -                | -        |
| R4             | -               | -          | -               | -          | -               | -     | 174             | 36         | -               | -          | -               | -        | 113             | 0         | -               | -        | -               | -         | -                | -        |
| R5             | -               | -          | -               | -          | -               | -     | 83              | 11         | -               | -          | -               | -        | 155             | 21        | -               | -        | 161             | 23        | -                | -        |
| R6             | -               | -          | 98              | -17        | -               | -     | -               | -          | -               | -          | -               | -        | -               | -         | -               | -        | -               | -         | -                | -        |
| R7             | -               | -          | 162             | -12        | -               | -     | 197             | -35        | -               | -          | -               | -        | -               | -         | -               | -        | -               | -         | -                | -        |
| R8             | -               | -          | 100             | 22         | -               | -     | -               | -          | -               | -          | -               | -        | -               | -         | -               | -        | -               | -         | -                | -        |
| R9             | -               | -          | 89              | 17         | -               | -     | -               | -          | -               | -          | -               | -        | -               | -         | -               | -        | -               | -         | -                | -        |
| R10            | -               | -          | -               | -          | -               | -     | -               | -          | -               | -          | -               | -        | -               | -         | -               | -        | -               | -         | -                | -        |
| R11            | -               | -          | -               | -          | -               | -     | -               | -          | -               | -          | -               | -        | -               | -         | -               | -        | -               | -         | -                | -        |
| R12            | -               | -          | -               | -          | -               | -     | -               | -          | -               | -          | -               | -        | -               | -         | -               | -        | -               | -         | -                | -        |
| R13            | -               | -          | -               | -          | -               | -     | -               | -          | -               | -          | -               | -        | -               | -         | -               | -        | -               | -         | -                | -        |
| R14            | -               | -          | -               | -          | -               | -     | -               | -          | -               | -          | -               | -        | -               | -         | -               | -        | -               | -         | -                | -        |
| R15            | -               | -          | -               | -          | -               | -     | -               | -          | -               | -          | -               | -        | -               | -         | -               | -        | -               | -         | -                | -        |
| R16            | -               | -          | -               | -          | -               | -     | -               | -          | -               | -          | -               | -        | -               | -         | -               | -        | -               | -         | -                | -        |
| R17            | -               | -          | -               | -          | -               | -     | -               | -          | -               | -          | -               | -        | -               | -         | -               | -        | -               | -         | -                | -        |
| R18            | -               | -          | -               | -          | -               | -     | -               | -          | 136             | 61         | -               | -        | 186             | 0         | -               | -        | -               | -         | -                | -        |
| R19            | 127             | -54        | -               | -          | -               | -     | -               | -          | -               | -          | -               | -        | 175             | 60        | -               | -        | -               | -         | -                | -        |
| R20            | -               | -          | -               | -          | -               | -     | -               | -          | -               | -          | -               | -        | -               | -         | -               | -        | 76              | 24        | -                | -        |
| R21            | -               | -          | -               | -          | -               | -     | -               | -          | 26              | -21        | -               | -        | -               | -         | -               | -        | -               | -         | -                | -        |
| R22            | -               | -          | -               | -          | -               | -     | 74              | 0          | -               | -          | -               | -        | -               | -         | -               | -        | -               | -         | -                | -        |
| <b>Max</b>     | <b>127</b>      | <b>-54</b> | <b>162</b>      | <b>22</b>  | -               | -     | <b>197</b>      | <b>36</b>  | <b>136</b>      | <b>61</b>  | <b>0</b>        | <b>0</b> | <b>186</b>      | <b>60</b> | <b>0</b>        | <b>0</b> | <b>168</b>      | <b>24</b> | <b>0</b>         | <b>0</b> |
| <b>Min</b>     | <b>127</b>      | <b>-54</b> | <b>89</b>       | <b>-17</b> | -               | -     | <b>74</b>       | <b>-40</b> | <b>26</b>       | <b>-21</b> | <b>0</b>        | <b>0</b> | <b>113</b>      | <b>-5</b> | <b>0</b>        | <b>0</b> | <b>76</b>       | <b>0</b>  | <b>0</b>         | <b>0</b> |
| <b>Average</b> | <b>127</b>      | <b>-54</b> | <b>112</b>      | <b>3</b>   | -               | -     | <b>121</b>      | <b>-6</b>  | <b>81</b>       | <b>20</b>  | -               | -        | <b>156</b>      | <b>15</b> | -               | -        | <b>136</b>      | <b>12</b> | -                | -        |
| <b>Stdev</b>   | -               | -          | <b>34</b>       | <b>20</b>  | -               | -     | <b>60</b>       | <b>32</b>  | <b>78</b>       | <b>58</b>  | -               | -        | <b>28</b>       | <b>27</b> | -               | -        | <b>42</b>       | <b>14</b> | -                | -        |
| <b>Median</b>  | <b>127</b>      | <b>-54</b> | <b>99</b>       | <b>3</b>   | -               | -     | <b>83</b>       | <b>0</b>   | <b>81</b>       | <b>20</b>  | -               | -        | <b>155</b>      | <b>0</b>  | -               | -        | <b>149</b>      | <b>12</b> | -                | -        |

**Table S11.** Maximum, minimum, median and the average length of ZoI for PM<sub>10</sub>, PM<sub>2.5</sub> and PM<sub>1</sub> at four different categories of TIs during multiple stopping driving conditions.

| Types of TIs            | Max          |              |               | Min          |              |               | Median       |              |               | Average      |              |               |
|-------------------------|--------------|--------------|---------------|--------------|--------------|---------------|--------------|--------------|---------------|--------------|--------------|---------------|
|                         | $X_1$<br>(m) | $X_2$<br>(m) | Length<br>(m) | $X_1$<br>(m) | $X_2$<br>(m) | Length<br>(m) | $X_1$<br>(m) | $X_2$<br>(m) | Length<br>(m) | $X_1$<br>(m) | $X_2$<br>(m) | Length<br>(m) |
| <b>PM<sub>10</sub></b>  |              |              |               |              |              |               |              |              |               |              |              |               |
| TI <sub>4w-nb</sub>     | 204          | -26          | 230           | 70           | 0            | 70            | 118          | -13          | 131           | 133          | -16          | 149           |
| TI <sub>3w-nb</sub>     | 200          | 77           | 123           | 86           | -41          | 127           | 148          | 14           | 134           | 148          | -10          | 158           |
| TI <sub>4w-wb</sub>     | -            | -            | -             | -            | -            | -             | -            | -            | -             | -            | -            | -             |
| TI <sub>3w-wb</sub>     | 184          | -70          | 254           | 111          | -79          | 190           | 148          | -75          | 222           | 148          | -75          | 222           |
| <b>PM<sub>2.5</sub></b> |              |              |               |              |              |               |              |              |               |              |              |               |
| TI <sub>4w-nb</sub>     | 197          | -23          | 220           | 49           | 0            | 49            | 133          | 13           | 120           | 126          | -1           | 127           |
| TI <sub>3w-nb</sub>     | 196          | 39           | 157           | 86           | -8           | 94            | 165          | 7            | 158           | 138          | 12           | 127           |
| TI <sub>4w-wb</sub>     | -            | -            | -             | -            | -            | -             | -            | -            | -             | -            | -            | -             |
| TI <sub>3w-wb</sub>     | 148          | -21          | 169           | 32           | -80          | 112           | 90           | -51          | 141           | 90           | -51          | 141           |
| <b>PM<sub>1</sub></b>   |              |              |               |              |              |               |              |              |               |              |              |               |
| TI <sub>4w-nb</sub>     | 197          | -54          | 251           | 74           | -17          | 91            | 99           | 0            | 99            | 120          | -19          | 139           |
| TI <sub>3w-nb</sub>     | 186          | 24           | 162           | 86           | 0            | 86            | 152          | 6            | 146           | 146          | 13           | 132           |
| TI <sub>4w-wb</sub>     | -            | -            | -             | -            | -            | -             | -            | -            | -             | -            | -            | -             |
| TI <sub>3w-wb</sub>     | 136          | 61           | 75            | 26           | -21          | 47            | 81           | 20           | 61            | 81           | 20           | 61            |

**Table S12.** Run-wise total RDD during Set<sub>1</sub> along with percentage contribution of RDD during delays at TIs to total RDD and percentage commuting time spent by the experimental car during delay conditions in Set<sub>1</sub>.

| Run No         | Total RDD during the whole run ( $\mu\text{g}$ ) |                   |                 | % fraction of total RDD during delay |                   |                 | Commuting time spent during delay (%) |
|----------------|--------------------------------------------------|-------------------|-----------------|--------------------------------------|-------------------|-----------------|---------------------------------------|
|                | PM <sub>10</sub>                                 | PM <sub>2.5</sub> | PM <sub>1</sub> | PM <sub>10</sub>                     | PM <sub>2.5</sub> | PM <sub>1</sub> |                                       |
| R1             | 16                                               | 2                 | 1               | 15%                                  | 13%               | 13%             | 12%                                   |
| R2             | 11                                               | 1                 | 1               | 2%                                   | 2%                | 2%              | 1%                                    |
| R3             | 13                                               | 1                 | 1               | 8%                                   | 7%                | 6%              | 5%                                    |
| R4             | 18                                               | 2                 | 1               | 12%                                  | 10%               | 11%             | 9%                                    |
| R5             | 17                                               | 2                 | 1               | 26%                                  | 20%               | 19%             | 19%                                   |
| R6             | 19                                               | 2                 | 1               | 4%                                   | 2%                | 2%              | 2%                                    |
| R7             | 15                                               | 2                 | 1               | 4%                                   | 2%                | 3%              | 2%                                    |
| R8             | 9                                                | 1                 | 1               | 6%                                   | 5%                | 6%              | 4%                                    |
| R9             | 11                                               | 2                 | 1               | 11%                                  | 4%                | 4%              | 4%                                    |
| R10            | 9                                                | 1                 | 1               | 10%                                  | 7%                | 9%              | 6%                                    |
| R11            | 8                                                | 1                 | 1               | 1%                                   | 1%                | 1%              | 1%                                    |
| R12            | 9                                                | 1                 | 1               | 7%                                   | 4%                | 5%              | 5%                                    |
| R13            | 39                                               | 3                 | 1               | 4%                                   | 4%                | 5%              | 4%                                    |
| R14            | 19                                               | 2                 | 1               | 28%                                  | 16%               | 23%             | 15%                                   |
| R15            | 15                                               | 2                 | 1               | 10%                                  | 7%                | 10%             | 8%                                    |
| R16            | 20                                               | 2                 | 1               | 21%                                  | 13%               | 17%             | 16%                                   |
| R17            | 16                                               | 2                 | 1               | 16%                                  | 9%                | 11%             | 11%                                   |
| R18            | 30                                               | 5                 | 1               | 7%                                   | 7%                | 6%              | 6%                                    |
| R19            | 26                                               | 4                 | 1               | 15%                                  | 11%               | 10%             | 9%                                    |
| R20            | 25                                               | 5                 | 1               | 10%                                  | 7%                | 6%              | 6%                                    |
| R21            | 16                                               | 3                 | 1               | 9%                                   | 6%                | 6%              | 6%                                    |
| R22            | 14                                               | 3                 | 1               | 3%                                   | 3%                | 2%              | 3%                                    |
| <b>Average</b> | 17                                               | 2                 | 1               | 10%                                  | 7%                | 8%              | 7%                                    |
